# Supplementary material
Source: PubMed Central journal article supplement (PMC5836512)
Supplement: NIHMS939802-supplement-1.pdf [file NIHMS939802-supplement-1.pdf]

METHOD S1: Mathematical model, related to Figure 4, Figure 7, Figure S4-S5

Protein concentrations (HEK293 cells)

Table T1

| protein               | concentration [nM] | reference           |
|-----------------------|--------------------|---------------------|
| Cul1                  | 522                | Reitsma et al. 2017 |
| Cand1                 | 1210               |                     |
| CSN <sup>(a)</sup>    | 378                |                     |
| DCN1                  | 325                |                     |
| Skp1                  | 2107               |                     |
| Rbx1                  | 1724               |                     |
| Nedd8 (N8)            | 3373               |                     |
| $\beta$ -TrCP         | 64                 | this paper          |
| I $\kappa$ B $\alpha$ | 647                | this paper          |

<sup>(a)</sup> average value of CSN1-CSN8 excluding CSN7

Total DCN concentration

In humans there are 5 DCN proteins (DCN1-5) all of which bind to Cul1 with similar affinity [Monda et al. (2013), Keuss et al. (2016)]. In addition, it seems that the 5 DCN proteins are partially functionally redundant so that the effective pool of catalytically active DCN proteins is likely to be larger than the DCN1 pool. To account for this effect in our model we defined the total DCN concentration by

$$[DCN] = f_{DCN1} \cdot [DCN1]. \quad (S1)$$

To estimate the scale factor  $f_{DCN1}$  we note that in HeLa cells the total copy number of DCN proteins (DCN1-5) amounts to 256892 of which the sum of DCN1 and DCN2 equals 94931 [Kulak et al., 2014]. Assuming that the concentrations of DCN1 and DCN2 are equal and that the relative proportions of DCN proteins in HEK 293 cells are similar to those in HeLa cells we obtain  $f_{DCN1} = 256892/(94931/2) \approx 5.4$  which suggests that  $5 \leq f_{DCN1} \leq 6$ . In the simulations we used  $f_{DCN1} = 6$ .

Sequestration of Cand1, CSN and DCN1 by other cullins

Cand1, CSN and DCN1 do not only bind to Cul1 but also to other cullins (Cul2-Cul5) in cullin-RING ubiquitin ligases (CRLs) [Bennett et al., 2010] which reduces the amounts of Cand1, CSN and DCN1 that are available for binding to Cul1. To account for this effect in our model we defined effective Cand1, CSN and DCN1 concentrations through

$$[Cand1]_{eff} = f_{cand1,WT} \cdot [Cand1] \quad (S2)$$

$$[DCN1]_{eff} = f_{DCN1,WT} \cdot [DCN] \quad (S3)$$

$$[CSN]_{eff} = f_{CSN,WT} \cdot [CSN] \quad (S4)$$

where  $[Cand1]$ ,  $[DCN]$  and  $[CSN]$  are defined in Table T1 and Eq. (S1). Since DCN proteins bind cullins with similar affinity (within a factor of  $\sim 10$ ) [Monda et al. (2013), Keuss et al. (2016)] we assumed that the scale factor  $f_{DCN1,WT}$  is proportional to the relative abundance of Cul1, i.e.

$$f_{DCN1,WT} = \frac{[Cul1]}{[Rbx1] + [Cul5]} = \frac{522nM}{1724nM + 548nM} \approx 0.23. \quad (S5)$$

Here we used the concentration of Rbx1 (cf. Table T1) as a measure for the concentration of Cul1-Cul4 all of which form stable heterodimers with Rbx1 [Lydeard et al., 2013]. The concentration of Cul5 was extrapolated from the value reported in [Bennett et al., 2010] according to

$$[Cul5] = \frac{[Cul1]}{[Cul1]_{Bennett}} [Cul5]_{Bennett} \approx \frac{522nM}{302nM} 317nM \approx 548nM.$$

For simplicity, we used the same scale factor for CSN as for DCN defined in Eq. (S5), i.e.

$$f_{CSN,WT} = f_{DCN1,WT} \approx 0.23. \quad (S6)$$

However, previous measurements have shown that if neddylation is inhibited the fraction of Cand1 associated with Cul1 is  $0.4/0.75 \approx 0.54$  (Fig. S6 in [Bennett et al., 2010]) suggesting that more than half of the total Cand1 pool is associated with Cul1 under cellular conditions. Hence, we set  $f_{Cand1,WT} = 0.54$  in Eq. (S2).

### State variables and initial conditions

Table T2 lists the state variables together with their initial values as used in our simulations. F-box proteins (Fb) bind to Cul1 via the Skp1 adaptor protein. Due to the 1:1 stoichiometry between Skp1 and F-box proteins the total concentration of substrate receptors (Skp1•F-box dimers) is bounded by the availability of Skp1 proteins, i.e.  $[FbT] \leq [Skp1] = 2107nM$ . In principle, it is conceivable that the amount of Skp1•F-box heterodimers is lower than the total amount of. However, to reduce the number of unknown parameters that have to be estimated by comparing model simulations with experiments (cf. [Parameter estimation](#)) we set  $[FbT] = [Skp1]$ .

### Model reaction and rate constants

We modeled the CRL cycle as a mass-action network. The network states together with the elementary reactions are depicted in Figs. S4A and S4B. The state variables together with their default initial values are defined in Table T2. Reversible reactions were parametrized by  $k_{on}$  and  $k_{off}$  rate constants while irreversible reactions were parametrized by (pseudo) first-order rate constant. The latter may represent an effective  $k_{cat}$  (as for neddylation and deneddylation) or a specific degradation rate (as in the case of substrate degradation). Reactions with the same set of parameters are labelled by the same digit (1-16). Individual reactions within a group of reactions with the same set of parameters are distinguished by a lower case letter (a,b,c,...).

In our model we considered two sets of F-box proteins,  $\beta$ -TrCP (Fb1) and auxiliary (background) substrate receptors (Fb2). In Fig. S4A and S4B only reactions involving Fb1 are shown. For each reaction involving Fb1 or S1 there exists a corresponding reaction for Fb2 or S2 which is listed in the tables below without an explicit reaction number.

Table T2

| state variable       | IC <sup>(a)</sup> | state variable    | IC | state variable         | IC |
|----------------------|-------------------|-------------------|----|------------------------|----|
| Cul1 <sup>(b)</sup>  | 522 nM            | Cul1•Cand1        | 0  | N8-Cul1•CSN            | 0  |
| Cand1 <sup>(b)</sup> | 1210 nM           | Cul1•Fb1          | 0  | Cul1•DCN1•Fb1          | 0  |
| DCN1 <sup>(b)</sup>  | 325 nM            | Cul1•Fb2          | 0  | Cul1•DCN1•Fb2          | 0  |
| CSN <sup>(b)</sup>   | 378 nM            | Cul1•Fb1•S1       | 0  | Cul1•DCN1•Fb1•S1       | 0  |
| FbT <sup>(c)</sup>   | 2107 nM           | Cul1•Fb2•S2       | 0  | Cul1•DCN1•Fb2•S2       | 0  |
| Fb1 <sup>(b,d)</sup> | 64 nM             | Cul1•Cand1•Fb1    | 0  | Cul1•Cand1•DCN1        | 0  |
| Fb2 <sup>(e,f)</sup> | 2043 nM           | Cul1•Cand1•Fb2    | 0  | Cul1•Cand1•DCN1•Fb1    | 0  |
| Fb1•S1               | 0                 | Cul1•Cand1•Fb1•S1 | 0  | Cul1•Cand1•DCN1•Fb2    | 0  |
| Fb2•S2               | 0                 | Cul1•Cand1•Fb2•S2 | 0  | Cul1•Cand1•DCN1•Fb1•S1 | 0  |
| N8-Cul1              | 0                 | N8-Cul1•Fb1       | 0  | Cul1•Cand1•DCN1•Fb2•S2 | 0  |
| Cul1•DCN1            | 0                 | N8-Cul1•Fb2       | 0  | Cul1•Fb1•CSN           | 0  |
| Cul1•CSN             | 0                 | N8-Cul1•Fb1•S1    | 0  | Cul1•Fb2•CSN           | 0  |
| S1 (IκBα-P)          | 0                 | N8-Cul1•Fb2•S2    | 0  | Cul1•DCN1•CSN          | 0  |
| S2 (auxiliary)       | 0                 | N8-Cul1•Fb1•CSN   | 0  | Cul1•DCN1•Fb1•CSN      | 0  |
|                      |                   | N8-Cul1•Fb2•CSN   | 0  | Cul1•DCN1•Fb2•CSN      | 0  |

<sup>(a)</sup> initial condition, <sup>(b)</sup> measured, <sup>(c)</sup>  $[FbT] = [Skp1]$ , <sup>(d)</sup>  $\beta$ -TrCP, <sup>(e)</sup>  $[Fb2] = [FbT] - [Fb1]$ , <sup>(f)</sup> auxiliary substrate receptors

### F-box binding to Cul1

The assembly of a functional Skp1•Cul1•F-box (SCF) complex requires binding of a Skp1•F-box heterodimer to Cul1. Here, we did not model the formation of Skp1•F-box dimers explicitly, but considered them as preformed stable entities [Schulman et al., 2009]. In general, there are ~69 different SCF complexes in humans. In our model we considered only two types of Skp1•F-box proteins denoted by Fb1 and Fb2. This allows us to analyze the time scale for the degradation of a specific substrate (mediated by Fb1) in the presence of auxiliary substrate receptors (SRs). The latter compete with Fb1 for access to Cul1, and they are collectively denoted by Fb2.

In a previous study the assembly of ~50 F-box proteins with Cul1 has been quantified under different conditions [Reitsma et al., 2017]. Under normal conditions occupancy ranged from 0% to 70% indicating a highly non-equilibrium steady state *in vivo* that is driven by neddylation, F-box exchange and substrate availability. Even in the absence of neddylation occupancy ranged between 0% and 30% suggesting that there exists some variation in the expression level and/or the binding affinity of Cul1 for different F-box proteins. For the Skp1•Fbxw7 receptor biochemical studies yielded a dissociation constant of 0.225pM which increased by ~6 orders of magnitude to 650nM in the presence of Cand1 [Pierce et al., 2013]. This dramatic increase is mainly driven by a corresponding increase in the  $k_{off}$  while the  $k_{on}$  remained almost constant. In fact, modulating the off rate constant has been proposed as one of the main mechanisms through which cells may adjust their cellular SCF repertoire [Reitsma et al, 2017].

To allow  $\beta$ -TrCP (Fb1) to exhibit a different binding affinity from background SRs we fix  $k_{on}$  at the values obtained for Fbxw7 and express the off rate constants for Fb1 and Fb2 in terms of those

for Fbxw7 as

$$k_{off,i}^{Fb1} = f_{Fb1} \cdot k_{off,i}^{Fbxw7} \quad \text{and} \quad k_{off,i}^{Fb2} = f_{Fb2} \cdot k_{off,i}^{Fbxw7}, \quad i = 1,2 \quad (S7)$$

where  $k_{off,1}^{Fbxw7} = 9 \cdot 10^{-7} s^{-1}$  and  $k_{off,2}^{Fbxw7} = 1.3 s^{-1}$  denote the off rate constants of Skp1•Fbxw7 from the binary and ternary complexes (involving Cand1), respectively [Pierce et al., 2013]. The values of the two scale parameters  $f_{Fb1}$  and  $f_{Fb2}$  were estimated by comparing model predictions with experiments (cf. [Parameter estimation](#) and Table T15).

Table T3

| No. | Reactions involving Fb1                           | $k_{on}^{(a)}$<br>[(M · s) <sup>-1</sup> ] | $k_{off}$<br>[s <sup>-1</sup> ] |
|-----|---------------------------------------------------|--------------------------------------------|---------------------------------|
| 1   | Cul1 + Fb1 ↔ Cul1•Fb1                             | 4 · 10 <sup>6</sup>                        | $f_{Fb1} \cdot 9 \cdot 10^{-7}$ |
| 1a  | Cul1•DCN1 + Fb1 ↔ Cul1•DCN1•Fb1                   |                                            |                                 |
| 1b  | Cul1 + Fb1•S1 ↔ Cul1•Fb1•S1                       |                                            |                                 |
| 1c  | Cul1•DCN1 + Fb1•S1 ↔ Cul1•DCN1•Fb1•S1             |                                            |                                 |
| 1d  | N8-Cul1 + Fb1 ↔ N8-Cul1•Fb1                       |                                            |                                 |
| 1e  | N8-Cul1 + Fb1•S1 ↔ N8-Cul1•Fb1•S1                 |                                            |                                 |
| 1f  | N8-Cul1•CSN + Fb1 ↔ N8-Cul1•Fb1•CSN               |                                            |                                 |
| 2   | Cul1•Cand1 + Fb1 ↔ Cul1•Cand1•Fb1                 | 2 · 10 <sup>6</sup>                        | $f_{Fb1} \cdot 1.3$             |
| 2a  | Cul1•Cand1•DCN1 + Fb1 ↔ Cul1•Cand1•DCN1•Fb1       |                                            |                                 |
| 2b  | Cul1•Cand1 + Fb1•S1 ↔ Cul1•Cand1•Fb1•S1           |                                            |                                 |
| 2c  | Cul1•Cand1•DCN1 + Fb1•S1 ↔ Cul1•Cand1•DCN1•Fb1•S1 |                                            |                                 |

(a) measured for Skp1•Fbxw7 [Pierce et al., 2013]

Table T4

|  | Reactions involving Fb2                           | $k_{on}$<br>[(M · s) <sup>-1</sup> ] | $k_{off}$<br>[s <sup>-1</sup> ] |
|--|---------------------------------------------------|--------------------------------------|---------------------------------|
|  | Cul1 + Fb2 ↔ Cul1•Fb2                             | 4 · 10 <sup>6</sup>                  | $f_{Fb2} \cdot 9 \cdot 10^{-7}$ |
|  | Cul1•DCN1 + Fb2 ↔ Cul1•DCN1•Fb2                   |                                      |                                 |
|  | Cul1 + Fb2•S2 ↔ Cul1•Fb2•S2                       |                                      |                                 |
|  | Cul1•DCN1 + Fb2•S2 ↔ Cul1•DCN1•Fb2•S2             |                                      |                                 |
|  | N8-Cul1 + Fb2 ↔ N8-Cul1•Fb2                       |                                      |                                 |
|  | N8-Cul1 + Fb2•S2 ↔ N8-Cul1•Fb2•S2                 |                                      |                                 |
|  | N8-Cul1•CSN + Fb2 ↔ N8-Cul1•Fb2•CSN               |                                      |                                 |
|  | Cul1•Cand1 + Fb2 ↔ Cul1•Cand1•Fb2                 | 2 · 10 <sup>6</sup>                  | $f_{Fb2} \cdot 1.3$             |
|  | Cul1•Cand1•DCN1 + Fb2 ↔ Cul1•Cand1•DCN1•Fb2       |                                      |                                 |
|  | Cul1•Cand1 + Fb2•S2 ↔ Cul1•Cand1•Fb2•S2           |                                      |                                 |
|  | Cul1•Cand1•DCN1 + Fb2•S2 ↔ Cul1•Cand1•DCN1•Fb2•S2 |                                      |                                 |

As suggested by our experiments (Fig. 2H) we modeled the assembly of SCF complexes by a

random-order binding mechanism (Fig. S4A), i.e. Skp1•F-box receptor proteins may first bind to Cul1 species and then bind substrate or vice versa. In fact, previous simulations indicated that an exchange factor becomes dispensable if binding occurs in a sequential order, i.e. if substrate only binds to F-box proteins if the latter are already bound to Cul1 [Straube et al., 2017].

### Cand1 binding to Cul1

The exchange of Skp1•F-box proteins on Cul1 is catalyzed by Cand1 which acts as a substrate receptor exchange factor [Pierce et al. (2013)]. Experiments suggest that Cand1 exerts its catalytic function similar to guanine nucleotide exchange factors, i.e. through formation of a ternary (Cul1•Cand1•Fb) complex. In the absence of Skp1•F-box proteins spontaneous dissociation of Cand1 from a Cul1•Cand1 complex is extremely slow ( $k_{off,3} = 10^{-5}s^{-1}$ ) [Pierce et al. (2013)] but binding of Skp1•F-box to Cul1•Cand1 dramatically increases the dissociation constant for Cand1 in the ternary complex (reaction 4). On thermodynamic grounds (cf. Detailed balance relations) the increase of the dissociation constant for Cand1 upon binding of Skp1•F-box to Cul1•Cand1 must be the same as the increase of the dissociation constant for Skp1•F-box upon binding of Cand1 to Cul1•Skp1•F-box, i.e (cf. Fig. S4C)

$$\frac{K_2}{K_1} = \frac{K_4}{K_3} = \tau \quad (S8)$$

where  $K_i = k_{off,i}/k_{on,i}$  denotes the dissociation constant of reaction  $i$ . Substituting the known values for  $K_1$  (0.225pM) and  $K_2$  (650nM) we obtain  $\tau \approx 2.9 \cdot 10^6$  which is comparable with values obtained for GTP/GDP exchange systems [Goody & Hofmann-Goody, 2002].

To compute the remaining dissociation constants we measured the rate constants for the association between Cul1 and Cand1 ( $k_{on,3}$ ) and that between Cul1•Skp1•Skp2 and Cand1 ( $k_{on,4}$ ) (cf. Fig. 1). In this way we obtained  $K_3 = 0.5pM$  and (using Eq. S8)  $K_4 = (K_2/K_1)K_3 \approx 1.44\mu M$ . The latter also determines the dissociation rate constant  $k_{off,4}$  as

$$k_{off,4} = k_{on,4} \cdot (K_2/K_1) \cdot K_3 \approx 2.9s^{-1}.$$

Reactions 5 and 6 describe the binding of Cand1 to Cul1 when DCN1 is already bound to Cul1. Our pulldown assay with immobilized DCN1 on GST beads showed (Fig. 3C and 3D) that in the presence of Cand1 the  $K_D$  of DCN1 in the ternary Cul1•Cand1•DCN1 complex is reduced by a factor  $\alpha = 1/36 = 0.0278$  (cf. Fig. S4C). To ensure that the  $K_D$  for Cand1 in the ternary complex is reduced by the same factor we multiplied the  $k_{off}$  for reaction 5 and 6 by  $\alpha$  and kept  $k_{on}$  the same as for reactions 3 and 4 (Table T5).

### Substrate binding to F-box protein

We assumed that substrate binds with equal affinity to free Skp1•F-box proteins as well as to Skp1•F-box proteins that are already bound to Cul1 (Cul1•Fb). In general, our model allows for two substrates that may differ in their binding parameters. In particular simulations S1 represents the phosphorylated form of IκBα (IκBα-P) while S2 plays the role of auxiliary (background) substrate which is always present in cells. The off rate constant ( $k_{off} \sim 10^{-5}s^{-1}$ ) for the dissociation of IκBα-P from Cul1•β-TrCP•IκBα-P is very small (cf. Fig. S5E) comparable to that for the dissociation of Skp1•F-box from an SCF complex. The on rate constant has not been

measured, but is expected to lie between  $10^6 - 10^7 (M \cdot s)^{-1}$ . In the simulations we used the value  $k_{on} = 10^7 (M \cdot s)^{-1}$  for both I $\kappa$ B $\alpha$ -P (S1) and auxiliary substrate (S2). Since the latter represents a mixture of different substrates (the type and amount of which is difficult to quantify for our experimental conditions) we assumed a less extreme value for the off rate constant of S2. The reactions involving S1 and S2 are listed in Table T6 and Table T7, respectively.

Table T5

| No. | Reactions                                                                                                   | $k_{on} [(M \cdot s)^{-1}]$ | $k_{off} [s^{-1}]$         |
|-----|-------------------------------------------------------------------------------------------------------------|-----------------------------|----------------------------|
| 3   | $Cul1 + Cand1 \leftrightarrow Cul1 \cdot Cand1$                                                             | $2 \cdot 10^7$ (a)          | $10^{-5}$ (b)              |
| 4   | $Cul1 \cdot Fb1 + Cand1 \leftrightarrow Cul1 \cdot Cand1 \cdot Fb1$                                         | $2 \cdot 10^6$ (a)          | 2.9 (c)                    |
|     | $Cul1 \cdot Fb2 + Cand1 \leftrightarrow Cul1 \cdot Cand1 \cdot Fb2$                                         |                             |                            |
| 4a  | $Cul1 \cdot Fb1 \cdot S1 + Cand1 \leftrightarrow Cul1 \cdot Cand1 \cdot Fb1 \cdot S1$                       |                             |                            |
|     | $Cul1 \cdot Fb2 \cdot S2 + Cand1 \leftrightarrow Cul1 \cdot Cand1 \cdot Fb2 \cdot S2$                       |                             |                            |
| 5   | $Cul1 \cdot DCN1 + Cand1 \leftrightarrow Cul1 \cdot Cand1 \cdot DCN1$                                       | $2 \cdot 10^7$              | $\alpha \cdot 10^{-5}$ (d) |
| 6   | $Cul1 \cdot DCN1 \cdot Fb1 + Cand1 \leftrightarrow Cul1 \cdot Cand1 \cdot DCN1 \cdot Fb1$                   | $2 \cdot 10^6$              | $\alpha \cdot 2.9$         |
|     | $Cul1 \cdot DCN1 \cdot Fb2 + Cand1 \leftrightarrow Cul1 \cdot Cand1 \cdot DCN1 \cdot Fb2$                   |                             |                            |
| 6a  | $Cul1 \cdot DCN1 \cdot Fb1 \cdot S1 + Cand1 \leftrightarrow Cul1 \cdot Cand1 \cdot DCN1 \cdot Fb1 \cdot S1$ |                             |                            |
|     | $Cul1 \cdot DCN1 \cdot Fb2 \cdot S2 + Cand1 \leftrightarrow Cul1 \cdot Cand1 \cdot DCN1 \cdot Fb2 \cdot S2$ |                             |                            |

(a) measured (b) measured [Pierce et al., 2013], (c) computed from Eq. (S8), (d)  $\alpha = 0.0278$

Table T6

| No. | Reactions involving S1                                                                                      | $k_{on} [(M \cdot s)^{-1}]$ | $k_{off} [s^{-1}]$      |
|-----|-------------------------------------------------------------------------------------------------------------|-----------------------------|-------------------------|
| 7   | $Fb1 + S1 \leftrightarrow Fb1 \cdot S1$                                                                     | $10^7$ (a)                  | $3.3 \cdot 10^{-5}$ (b) |
| 7a  | $Cul1 \cdot Fb1 + S1 \leftrightarrow Cul1 \cdot Fb1 \cdot S1$                                               |                             |                         |
| 7b  | $Cul1 \cdot Cand1 \cdot Fb1 + S1 \leftrightarrow Cul1 \cdot Cand1 \cdot Fb1 \cdot S1$                       |                             |                         |
| 7c  | $Cul1 \cdot DCN1 \cdot Fb1 + S1 \leftrightarrow Cul1 \cdot DCN1 \cdot Fb1 \cdot S1$                         |                             |                         |
| 7d  | $Cul1 \cdot Cand1 \cdot DCN1 \cdot Fb1 + S1 \leftrightarrow Cul1 \cdot Cand1 \cdot DCN1 \cdot Fb1 \cdot S1$ |                             |                         |
| 7e  | $N8-Cul1 \cdot Fb1 + S1 \leftrightarrow N8-Cul1 \cdot Fb1 \cdot S1$                                         |                             |                         |

(a) estimated, (b) measured

Table T7

| No. | Reactions involving S2                                                                                      | $k_{on} [(M \cdot s)^{-1}]$ | $k_{off} [s^{-1}]$ |
|-----|-------------------------------------------------------------------------------------------------------------|-----------------------------|--------------------|
|     | $Fb2 + S2 \leftrightarrow Fb1 \cdot S2$                                                                     | $10^7$ (a)                  | 0.01 (a)           |
|     | $Cul1 \cdot Fb2 + S2 \leftrightarrow Cul1 \cdot Fb2 \cdot S2$                                               |                             |                    |
|     | $Cul1 \cdot Cand1 \cdot Fb2 + S2 \leftrightarrow Cul1 \cdot Cand1 \cdot Fb2 \cdot S2$                       |                             |                    |
|     | $Cul1 \cdot DCN1 \cdot Fb2 + S2 \leftrightarrow Cul1 \cdot DCN1 \cdot Fb2 \cdot S2$                         |                             |                    |
|     | $Cul1 \cdot Cand1 \cdot DCN1 \cdot Fb2 + S2 \leftrightarrow Cul1 \cdot Cand1 \cdot DCN1 \cdot Fb2 \cdot S2$ |                             |                    |
|     | $N8-Cul1 \cdot Fb2 + S2 \leftrightarrow N8-Cul1 \cdot Fb2 \cdot S2$                                         |                             |                    |

(a) estimated

## DCN1 binding to Cul1

DCN1 is a scaffold-like E3 ligase which is required for efficient Cul1 neddylation [Kurz et al. (2008)]. Experiments have shown that DCN1 forms a stable ternary complex with Cul1 and Cand1 [Keuss et al. (2016)]. In the absence of Cand1 the  $K_D$  for DCN1 binding to Cul1 is comparably low ( $1.8\mu M$ ) [Monda et al. (2013)] while binding of Cand1 increases the affinity of DCN1 to Cul1 36-fold (Fig. 3C and 3D), i.e. the  $K_D$  is lowered by a factor  $\alpha = 1/36 = 0.0278$  (cf. Cand1 binding to Cul1). To generate a  $K_D$  of  $1.8\mu M$  we set  $k_{on} = 10^6 (M \cdot s)^{-1}$  and  $k_{off} = 1.8 s^{-1}$  (Table T8). When Cand1 is already bound to Cul1 we keep  $k_{on}$ , but lower  $k_{off}$  by a factor  $\alpha$ .

Table T8

| No. | Reactions                                                                                                   | $k_{on} [(M \cdot s)^{-1}]$ | $k_{off} [s^{-1}]$                |
|-----|-------------------------------------------------------------------------------------------------------------|-----------------------------|-----------------------------------|
| 8   | $Cul1 + DCN1 \leftrightarrow Cul1 \cdot DCN1$                                                               | $10^6$ <sup>(a)</sup>       | $1.8$ <sup>(b)</sup>              |
| 8a  | $Cul1 \cdot Fb1 + DCN1 \leftrightarrow Cul1 \cdot DCN1 \cdot Fb1$                                           |                             |                                   |
|     | $Cul1 \cdot Fb2 + DCN1 \leftrightarrow Cul1 \cdot DCN1 \cdot Fb2$                                           |                             |                                   |
| 8b  | $Cul1 \cdot Fb1 \cdot S1 + DCN1 \leftrightarrow Cul1 \cdot DCN1 \cdot Fb1 \cdot S1$                         |                             |                                   |
|     | $Cul1 \cdot Fb2 \cdot S2 + DCN1 \leftrightarrow Cul1 \cdot DCN1 \cdot Fb2 \cdot S2$                         | $10^6$                      | $\alpha \cdot 1.8$ <sup>(c)</sup> |
| 9   | $Cul1 \cdot Cand1 + DCN1 \leftrightarrow Cul1 \cdot Cand1 \cdot DCN1$                                       |                             |                                   |
| 9a  | $Cul1 \cdot Cand1 \cdot Fb1 + DCN1 \leftrightarrow Cul1 \cdot Cand1 \cdot DCN1 \cdot Fb1$                   |                             |                                   |
|     | $Cul1 \cdot Cand1 \cdot Fb2 + DCN1 \leftrightarrow Cul1 \cdot Cand1 \cdot DCN1 \cdot Fb2$                   |                             |                                   |
| 9b  | $Cul1 \cdot Cand1 \cdot Fb1 \cdot S1 + DCN1 \leftrightarrow Cul1 \cdot Cand1 \cdot DCN1 \cdot Fb1 \cdot S1$ |                             |                                   |
|     | $Cul1 \cdot Cand1 \cdot Fb2 \cdot S2 + DCN1 \leftrightarrow Cul1 \cdot Cand1 \cdot DCN1 \cdot Fb2 \cdot S2$ |                             |                                   |

<sup>(a)</sup> estimated, <sup>(b)</sup> adjusted so that  $K_D = 1.8\mu M$  [Monda et al. (2013)], <sup>(c)</sup>  $\alpha=0.0278$

## Detailed balance relations

The CRL network contains several thermodynamic cycles two of which are depicted in Fig. S4C. Since each of these cycles comprises only of reversible equilibria there must be no net flux in each cycle at steady state. In physical terms, this means that the change in free energy for the formation of the ternary complexes ( $Cul1 \cdot Cand1 \cdot Fb$  and  $Cul1 \cdot Cand1 \cdot DCN1$ ) must not depend on the order in which they are formed. This constraint leads to detailed balance relations between the dissociation constants in each cycle, i.e.  $K_1 \cdot K_4 = K_2 \cdot K_3$  and  $K_3 \cdot K_9 = K_5 \cdot K_8$ . A similar relation also holds for the cycle comprising the reactions 4, 6, 8a, and 9a which leads to  $K_4 \cdot K_9 = K_8 \cdot K_6$ .

## Neddylation reactions

Since DCN1 is required for efficient neddylation of Cul1 [Kurz et al. (2008)] and since Cand1 binding and N8 conjugation cannot occur simultaneously [Liu et al., 2002] we assumed that neddylation can only occur from SCF states where DCN1 is bound to Cul1 *and* Cand1 is not bound to Cul1. In general, Nedd8 (N8) conjugation is catalyzed by an associated E2 enzyme (e.g. UBC12) which is recruited to the Rbx1 domain of an SCF complex. However, the rate constants for E2 binding and N8 conjugation are not known. To keep the number of unknown parameters as small as possible we model neddylation by a first order process (Table T9) with effective neddylation rate constant  $k_{nedd}$  which is treated as a variable parameter to be estimated from experiments (cf. Table T15). Also, since the concentration of N8 is much larger than that of the

other proteins (cf. Table T1) we assumed that N8 is not limiting for the reaction so that it can be absorbed into the definition of the rate constant.

Table T9

| No. | Reactions                                                                          | $k_{nedd} [S^{-1}]$  |
|-----|------------------------------------------------------------------------------------|----------------------|
| 10  | $Cul1 \cdot DCN1 \rightarrow N8-Cul1 + DCN1$                                       | 0.268 <sup>(a)</sup> |
| 10a | $Cul1 \cdot DCN1 \cdot Fb1 \rightarrow N8-Cul1 \cdot Fb1 + DCN1$                   |                      |
|     | $Cul1 \cdot DCN1 \cdot Fb2 \rightarrow N8-Cul1 \cdot Fb2 + DCN1$                   |                      |
| 10b | $Cul1 \cdot DCN1 \cdot Fb1 \cdot S1 \rightarrow N8-Cul1 \cdot Fb1 \cdot S1 + DCN1$ |                      |
|     | $Cul1 \cdot DCN1 \cdot Fb2 \cdot S2 \rightarrow N8-Cul1 \cdot Fb2 \cdot S2 + DCN1$ |                      |

<sup>(a)</sup> estimated

### Deneddylation reactions

Deneddylation is mediated by the COP9 signalosome (CSN). Consistent with measurements of the rate constants for CSN-mediated deneddylation of N8-Cul1 [Mosadeghi et al. (2016)] we assumed that CSN first binds reversibly to N8-Cul1 and N8-Cul1•Fb (11 and 11a) and, in a second step, N8 is cleaved leading to the dissociation of CSN (12 and 12a).

Table T10

| No. | Reactions                                                             | $k_{on} [(M \cdot s)^{-1}]$   | $k_{off} [S^{-1}]$   | $k_{cat} [S^{-1}]$ |
|-----|-----------------------------------------------------------------------|-------------------------------|----------------------|--------------------|
| 11  | $N8-Cul1 + CSN \leftrightarrow N8-Cul1 \cdot CSN$                     | $2 \cdot 10^7$ <sup>(a)</sup> | 0.032 <sup>(a)</sup> |                    |
| 11a | $N8-Cul1 \cdot Fb1 + CSN \leftrightarrow N8-Cul1 \cdot Fb1 \cdot CSN$ |                               |                      |                    |
|     | $N8-Cul1 \cdot Fb2 + CSN \leftrightarrow N8-Cul1 \cdot Fb2 \cdot CSN$ |                               |                      |                    |
| 12  | $N8-Cul1 \cdot CSN \rightarrow Cul1 + CSN$                            |                               |                      | 1.1 <sup>(a)</sup> |
| 12a | $N8-Cul1 \cdot Fb1 \cdot CSN \rightarrow Cul1 \cdot Fb1 + CSN$        |                               |                      |                    |
|     | $N8-Cul1 \cdot Fb2 \cdot CSN \rightarrow Cul1 \cdot Fb2 + CSN$        |                               |                      |                    |

<sup>(a)</sup> measured [Mosadeghi et al., 2016]

### Product inhibition of CSN

While neddylated Cul1 is a substrate of the CSN deneddylated Cul1 acts as an inhibitor of CSN activity [Mosadeghi et al. (2016)]. CSN binds to both neddylated and deneddylated Cul1, but with different binding affinity. While the  $k_{on}$  is the same for both reactions while the  $k_{off}$  for CSN in complex with non-neddylated Cul1 is increased by a factor of ~200. Previous biochemical analysis has shown that, in the presence of Cand1 or substrate, the deneddylation rate is reduced [Emberly et al., 2012]. Moreover, addition of substrate impedes stable association of CSN with SCF [Enchev et al., 2012]. Hence, to model product inhibition of CSN we assumed that CSN only binds to Cul1, Cul1•Fb, Cul1•DCN1 and Cul1•DCN1•Fb states (cf. Table T11).

Table T11



| No. | Reactions                                                                             | $k_{on} [(M \cdot s)^{-1}]$ | $k_{off} [s^{-1}]$ |
|-----|---------------------------------------------------------------------------------------|-----------------------------|--------------------|
| 13  | $Cul1 + CSN \leftrightarrow Cul1 \cdot CSN$                                           | $2 \cdot 10^7$ (a)          | $6.2$ (a)          |
| 13a | $Cul1 \cdot Fb1 + CSN \leftrightarrow Cul1 \cdot Fb1 \cdot CSN$                       |                             |                    |
|     | $Cul1 \cdot Fb2 + CSN \leftrightarrow Cul1 \cdot Fb2 \cdot CSN$                       |                             |                    |
| 13b | $Cul1 \cdot DCN1 + CSN \leftrightarrow Cul1 \cdot DCN1 \cdot CSN$                     |                             |                    |
| 13c | $Cul1 \cdot DCN1 \cdot Fb1 + CSN \leftrightarrow Cul1 \cdot DCN1 \cdot Fb1 \cdot CSN$ |                             |                    |
|     | $Cul1 \cdot DCN1 \cdot Fb2 + CSN \leftrightarrow Cul1 \cdot DCN1 \cdot Fb2 \cdot CSN$ |                             |                    |

(a) measured [Mosadeghi et al., 2016]

### Substrate degradation

Substrate degradation by itself is a complex process which involves recruitment of Ub-loaded E2 enzyme to the Rbx1 domain of an SCF complex, subsequent multiple Ub transfers to the substrate and processing by the 26S proteasome. Here, we neglected much of this complexity and assumed that once a substrate-bound SCF complex is neddylated the substrate can be degraded. The latter process was described by first order rate constant  $k_{deg}$  which summarizes the above mentioned processes in an effective manner (Table T12). Also, for simplicity we assumed that the degradation rate is the same for S1 (IkB $\alpha$ -P) and background substrate S2. For the human 26S proteasome substrate degradation rates range from less than  $0.01 \text{ min}^{-1}$  up to  $0.7 \text{ min}^{-1}$  depending on the substrate and the number of conjugated ubiquitins [Lu et al., 2016]. For CyclinB-NT with 4 conjugated ubiquitins the degradation rate is  $0.5 \text{ min}^{-1}$  or  $0.0083 \text{ s}^{-1}$ . Based on our measurements we estimated  $k_{deg} = 0.0071 \text{ s}^{-1}$  (cf. Table T15).

Table T12

| No. | Reactions                                                  | $k_{deg} [s^{-1}]$ |
|-----|------------------------------------------------------------|--------------------|
| 14  | $N8-Cul1 \cdot Fb1 \cdot S1 \rightarrow N8-Cul1 \cdot Fb1$ | $0.0071$ (a)       |
|     | $N8-Cul1 \cdot Fb2 \cdot S2 \rightarrow N8-Cul1 \cdot Fb2$ |                    |

(a) estimated

### Background substrate

To match simulations with experiments we had to assume that cells contain a certain amount of CRL substrates. Otherwise, it was not possible to generate the high degree of Cul1 neddylation observed experimentally which is consistent with the fact that substrate favors the neddylated state of CRL ligases [Emberly et al., 2012; Enchev et al., 2012]. To generate auxiliary substrate we assumed a constitutive synthesis term (Table T13). Since the total amount of background CRL substrates in the cell is unknown we treated the synthesis rate as a variable parameter to be determined by comparison with experiments (cf. Table T15). In this way we obtained an estimate of 2261nM for the concentration of background substrate under steady state conditions in wildtype cells assuming that substrates are only degraded via the CRL-mediated pathway.

Table T13

| No. | reaction                   | $k_{synth}^{S2} [nM \cdot s^{-1}]$ |
|-----|----------------------------|------------------------------------|
| 15  | $\emptyset \rightarrow S2$ | $1.4$ (a)                          |

(a) estimated

Simulations were done with the Systems Biology Toolbox of MATLAB [MATLAB 2015b] which was

used to translate the model reactions (1-15) into a system of ordinary differential equations using mass-action kinetics. Integrations were performed with the implicit solver *ode15s*.

### Parameter estimation

To validate our model we measured different quantities in wildtype (WT) cells as well as in response to different genetic perturbations (cf. Table T14). Conditions listed in **bold font** were used to estimate the values of unknown parameters. Altogether, our model comprises 54 state variables and 35 parameters (rate constants, protein concentrations and scale parameters) from which 22 parameters were either known from previous experiments or measured in this work. Among the 13 remaining parameters 8 parameters could be reasonably estimated or constrained leaving only 5 parameters to be fitted by comparing model simulations with experiments. The 4 scale factors P1 – P4 (Table T15) were estimated based on relative protein abundances and previous measurements of the association of Cand1 with different cullins. The 4 on and off rate constants P5 – P8 had almost no effect on the value of the measured quantities (cf. T14 and Fig. S5B), so we fixed them at the indicated values to reduce the number of variable parameters during the fitting procedure.

Table T14 – Experimental conditions and measured quantities

| measured quantity                    | cell type / perturbation / condition                              | type of experiment | figure |
|--------------------------------------|-------------------------------------------------------------------|--------------------|--------|
| Cul1.b2.Cand1 <sup>(a)</sup>         | <b>WT</b> <sup>(e)</sup> / WT + MLN4924                           | steady state       | 4B     |
| Cul1.b2.Skp1 <sup>(b)</sup>          | WT / WT + MLN4924 / <b>DKO</b> <sup>(f)</sup>                     | steady state       | 4B     |
| Cul1.b2.N8 <sup>(c)</sup>            | <b>WT</b> / WT + Cul1 / <b>DKO</b> / DKO + Cul1                   | steady state       | 4E     |
| $\beta$ -TrCP.b2.Cul1 <sup>(d)</sup> | <b>WT</b>                                                         | steady state       | 4D     |
| $t_{1/2}$                            | <b>WT</b> / <b>DKO</b> / DKO + Cand1                              | transient          | 4C     |
|                                      | WT + $\beta$ -TrCP / WT + Cul1 / DKO + $\beta$ -TrCP / DKO + Cul1 |                    | 4F     |

<sup>(a)</sup> fraction of Cul1 bound to Cand1, <sup>(b)</sup> fraction of Cul1 bound to Skp1, <sup>(c)</sup> fraction of Cul1 bound to Ned8, <sup>(d)</sup> fraction of  $\beta$ -TrCP bound to Cul1, <sup>(e)</sup> WT – wildtype, <sup>(f)</sup> DKO – double knockout Cand1<sup>-/-</sup>, Cand2<sup>-/-</sup>

To estimate the values of the 5 remaining parameters in Table T15 (P9-P13) we used nonlinear optimization in combination with a profile likelihood approach as described in [Raue et al., 2009]. To calibrate the model we defined the weighted sum of squared residuals as an objective function

$$\chi^2(\theta) := \sum_{k=1}^6 \frac{(y_k - y_k(\theta))^2}{\sigma_k^2} \quad (\text{S9})$$

and numerically determined  $\theta = (f_{Fb1}, f_{Fb2}, k_{nedd}, k_{deg}, k_{synth}^{S2})$  such that

$$\hat{\theta} = \operatorname{argmin} [\chi^2(\theta)].$$

In Eq. (S9)  $y_k$  and  $\sigma_k^2$  denote the values of the measured quantities (cf. T14, bold face) and their respective measurement errors. The quantities  $y_k(\theta)$  are the predicted values of the measured quantities obtained from numerical simulations of our model for a particular set of parameter values. Due to limited sample size we were not able to reliably estimate the measurement errors from the data. So, for convenience, we assumed equal variances of  $\sigma_k^2 = 0.1y_k$  (10% from the

mean values) for all measurements. However, since all parameters are identifiable (see below) a different choice for the values of the variances would yield qualitatively similar results.

To obtain confidence intervals for the estimated parameter values we numerically computed the profile likelihood for each parameter defined as

$$\chi_{PL}^2(\theta_i) = \min_{\theta_{j \neq i}}[\chi^2(\theta)], \quad (S10)$$

i.e. for each value of  $\theta_i$  the objective function defined in Eq. (S9) is re-optimized with respect to the remaining parameters  $\theta_{j \neq i}$ . The resulting plots exhibit a parabolic shape (Fig. S5A) indicating that all parameters are identifiable [Raue et al., 2009]. To obtain finite sample confidence intervals we defined the confidence regions

$$\{\theta_i: \chi_{PL}^2(\theta) - \chi^2(\hat{\theta}) < \Delta_\alpha\}, \quad i = 1, \dots, 5 \quad (S11)$$

where the threshold  $\Delta_\alpha = \chi^2(\alpha, df)$  is the  $\alpha$  quantile (confidence level) of the  $\chi^2$ -distribution with  $df$  degrees of freedom. Pointwise confidence intervals are obtained for  $df = 1$  while  $df = 5$  yields simultaneous confidence intervals for all 5 parameters. Confidence intervals for model predictions (cf. Fig. 4) were computed by running simulations for parameters sampled from the confidence region defined by Eq. (S11) with the threshold  $\Delta_\alpha = \chi^2(0.95, 5)$  (Fig. S5A, upper horizontal line).

Table T15 – List of estimated parameters

| parameter | value                         | expected range         | defined in                          | fixed / variable |          |
|-----------|-------------------------------|------------------------|-------------------------------------|------------------|----------|
| P1        | $f_{DCN1}$                    | 6                      | 5 – 6                               | Eq. (S1)         | fixed    |
| P2<br>P3  | $f_{DCN1,WT}$<br>$f_{CSN,WT}$ | 0.23                   |                                     | Eqs. (S2) – (S4) | fixed    |
| P4        | $f_{Cand1,WT}$                | 0.54                   |                                     |                  | fixed    |
| P5        | $k_{on}^{S1}$                 | $10^7 (Ms)^{-1}$       | $10^6 - 10^7 (Ms)^{-1}$             | Table T6         | fixed    |
| P6        | $k_{on}^{S2}$                 | $10^7 (Ms)^{-1}$       | $10^6 - 10^7 (Ms)^{-1}$             | Table T7         | fixed    |
| P7        | $k_{off}^{S2}$                | $0.01 s^{-1}$          | $0.0001 - 0.01 s^{-1}$              | Table T7         | fixed    |
| P8        | $k_{on}^{DCN1}$               | $10^6 (Ms)^{-1}$       | $10^6 - 10^7 (Ms)^{-1}$             | Table T8         | fixed    |
| P9        | $f_{Fb1}$                     | 0.247                  | $0.102 - 0.490^{(a)}$               | Eq. (S7)         | variable |
| P10       | $f_{Fb2}$                     | 6.514                  | $2.978 - 17.461^{(a)}$              | Eq. (S7)         | variable |
| P11       | $k_{nedd}$                    | $0.268 s^{-1}$         | $0.134 - 0.626 s^{-1}^{(a)}$        | Table T9         | variable |
| P12       | $k_{deg}$                     | $0.0071 s^{-1}$        | $0.0055 - 0.0091 s^{-1}^{(a)}$      | Table T12        | variable |
| P13       | $k_{synth}^{S2}$              | $1.40 nM \cdot s^{-1}$ | $1.09 - 1.85 nM \cdot s^{-1}^{(a)}$ | Table T13        | variable |

<sup>(a)</sup> simultaneous confidence intervals to a 95% confidence level with 10% assumed measurement errors.

### Response coefficients

To quantify how small changes in one of the parameters (P5 – P13) would impact the predicted

values for the measured quantities (cf. T14) we computed the matrix of response coefficients (Fig. S5B) according to

$$R_{ij} := \frac{\Delta Q_i / Q_i^{ref}}{\Delta P_j / P_j^{ref}} \quad (S12)$$

where  $\Delta P_j = P_j - P_j^{ref}$  denotes the change of parameter  $P_j$  relative to a reference value  $P_j^{ref}$  and  $\Delta Q_i = Q_i - Q_i^{ref}$  represents the corresponding change of the predicted quantity  $Q_i$ . Depending on whether  $Q_i$  increases or decreases upon a parameter change  $\Delta P_j$  the response coefficient  $R_{ij}$  may be positive or negative, respectively. Its magnitude quantifies the fractional change of  $Q_i$  upon a fractional change of  $P_j$ . The fact that almost all response coefficients satisfy  $|R_{ij}| < 1$  means that our system exhibits only a weak sensitivity to most of the parameters at the respective reference point. This is particularly true for the 4 on and off rate constants P5 – P8 which have almost no effect on the predicted values of the measured quantities except for  $k_{on}^{DCN}$  which weakly affects the half-life for substrate degradation in DKO. To reduce the number of fitting parameters we have, therefore, fixed P5 – P8 during parameter estimation.

From the entries of the response matrix for the remaining parameters (P9 – P13) we can make some interesting observations: The fractions of Cul1 bound to Cand1, Skp1 and Nedd8 (first three rows) are mainly determined by the ratio between substrate synthesis ( $k_{synth}^{S2}$ ) and degradation ( $k_{deg}$ ). If the substrate synthesis rate is increased the neddylated fraction of Cul1 increases and more Skp1•F-box proteins are recruited to Cul1 leading to a reduction of the fraction of Cul1 associated with Cand1. Increasing  $k_{deg}$  has the opposite effect. However, the latter also affects the half-life for IκBα degradation while  $k_{synth}^{S2}$  has only a minor effect on  $t_{1/2}$ . Interestingly the total concentration of Skp1•F-box proteins (FbT) has a strong positive effect on the half-life for IκBα degradation in DKO cells because increasing the total pool of F-box proteins reduces the amount of Cul1 available for binding to β-TrCP.

### Protein fractions in terms of state variables

To relate the measured quantities defined in Table T14 to state variables in our model (cf. Table 2) we used the following relations: The fraction of Cul1 bound to Nedd8 was computed as

$$\begin{aligned} \text{Cul1.b2.N8} = & \frac{[\text{N8-Cul1}] + [\text{N8-Cul1} \cdot \text{Fb1}] + [\text{N8-Cul1} \cdot \text{Fb2}]}{\text{Cul1}_T} \\ & + \frac{[\text{N8-Cul1} \cdot \text{Fb1} \cdot \text{S1}] + [\text{N8-Cul1} \cdot \text{Fb2} \cdot \text{S2}] + [\text{N8-Cul1} \cdot \text{CSN}]}{\text{Cul1}_T} \\ & + \frac{[\text{N8-Cul1} \cdot \text{Fb1} \cdot \text{CSN}] + [\text{N8-Cul1} \cdot \text{Fb2} \cdot \text{CSN}]}{\text{Cul1}_T} \end{aligned}$$

where  $\text{Cul1}_T$  denotes the total concentration of Cul1 defined in Table T1. To define the fractions of Cul1 bound to Cand1 (Cul1.b2.Cand1) and Cul1 bound to Skp1•F-box (Cul1.b2.Skp1) we had to take into account that higher-order complexes involving Cand1 and Fb1 or Fb2 are unstable and, thus, cannot be detected in our pull-down assays. For example, the complexes Cul1•Cand1•Fbi•Si would rapidly decay into Cul1•Fbi•Si and Cand1 or Cul1•Cand1 and Fbi•Si (Fig. S5C). The corresponding probabilities are given by

$$a_i = \frac{k_{off,2}^{Si}}{k_{off,2}^{Si} + k_{off,4}} \quad \text{and} \quad b_i = 1 - a_i = \frac{k_{off,4}}{k_{off,2}^{Si} + k_{off,4}}, \quad (S13)$$

$i = 1,2$

where the rate constants  $k_{off,2}^{Si}$  and  $k_{off,4}$  are defined in Tables T3-T5. For the decay of complexes involving Cand1, DCN1 and Fb1 or Fb2 we considered three decay channels as the dissociation of Cand1 and DCN1 from Cul1•Cand1•DCN1•Fb•Si or Cul1•Cand1•DCN1•Fbi occurs with similar rates. The respective probabilities are given by

$$c_i = \frac{k_{off,2}^{Si}}{k_{off,2}^{Si} + k_{off,6} + k_{off,9}}, \quad d_i = \frac{k_{off,6}}{k_{off,2}^{Si} + k_{off,6} + k_{off,9}}, \quad e_i = 1 - (c_i + d_i), \quad i = 1,2 \quad (S14)$$

where the rate constants  $k_{off,6}$  and  $k_{off,9}$  are defined in Tables T5 and T8, respectively. With the help of these probabilities the protein fractions Cul1.b2.Cand1 and Cul1.b2.Skp1 (which we set equal to Cul1.b2.Fb1+Cul1.b2.Fb2) are defined by

$$\begin{aligned} \text{Cul1.b2.Cand1} = & \frac{[\text{Cul1} \cdot \text{Cand1}] + a_1([\text{Cul1} \cdot \text{Cand1} \cdot \text{Fb1}] + [\text{Cul1} \cdot \text{Cand1} \cdot \text{Fb1} \cdot \text{S1}])}{\text{Cul1}_T} \\ & + \frac{a_2([\text{Cul1} \cdot \text{Cand1} \cdot \text{Fb2}] + [\text{Cul1} \cdot \text{Cand1} \cdot \text{Fb2} \cdot \text{S2}]) + [\text{Cul1} \cdot \text{Cand1} \cdot \text{DCN1}]}{\text{Cul1}_T} \\ & + \frac{(a_1 e_1 + c_1)([\text{Cul1} \cdot \text{Cand1} \cdot \text{DCN1} \cdot \text{Fb1}] + [\text{Cul1} \cdot \text{Cand1} \cdot \text{DCN1} \cdot \text{Fb1} \cdot \text{S1}])}{\text{Cul1}_T} \\ & + \frac{(a_2 e_2 + c_2)([\text{Cul1} \cdot \text{Cand1} \cdot \text{DCN1} \cdot \text{Fb2}] + [\text{Cul1} \cdot \text{Cand1} \cdot \text{DCN1} \cdot \text{Fb2} \cdot \text{S2}])}{\text{Cul1}_T} \end{aligned}$$

and

$$\begin{aligned} \text{Cul1.b2.Fbi} = & \frac{[\text{Cul1} \cdot \text{Fbi}] + [\text{Cul1} \cdot \text{Fbi} \cdot \text{Si}] + [\text{Cul1} \cdot \text{DCN1} \cdot \text{Fbi}]}{\text{Cul1}_T} \\ & + \frac{b_i([\text{Cul1} \cdot \text{Cand1} \cdot \text{Fbi}] + [\text{Cul1} \cdot \text{Cand1} \cdot \text{Fbi} \cdot \text{Si}])}{\text{Cul1}_T} \\ & + \frac{(b_i e_i + d_i)([\text{Cul1} \cdot \text{Cand1} \cdot \text{DCN1} \cdot \text{Fbi}] + [\text{Cul1} \cdot \text{Cand1} \cdot \text{DCN1} \cdot \text{Fbi} \cdot \text{Si}])}{\text{Cul1}_T} \\ & + \frac{[\text{N8-Cul1} \cdot \text{Fbi}] + [\text{N8-Cul1} \cdot \text{Fbi} \cdot \text{Si}] + [\text{N8-Cul1} \cdot \text{Fbi} \cdot \text{CSN}]}{\text{Cul1}_T} \\ & + \frac{[\text{Cul1} \cdot \text{DCN1} \cdot \text{Fbi} \cdot \text{CSN}] + [\text{Cul1} \cdot \text{Fbi} \cdot \text{CSN}] + [\text{Cul1} \cdot \text{DCN1} \cdot \text{Fbi} \cdot \text{Si}]}{\text{Cul1}_T} \end{aligned}$$

for  $i = 1,2$ . The fraction of  $\beta$ -TrCP bound to Cul1 ( $\beta$ -TrCP.b2.Cul1) is given by

$$\beta\text{-TrCP.b2.Cul1} = \text{Cul1.b2.Fb1} \frac{\text{Cul1}_T}{\text{Fb1}_T}$$

where  $\text{Fb1}_T$  equals the total  $\beta$ -TrCP concentration listed in Table T1.

## Simulation protocols

To simulate I $\kappa$ B $\alpha$  degradation of we started simulations from steady state by adding the reaction

| No. | reaction                                                          | $k_{phos}$ [ $S^{-1}$ ] | initial condition              |
|-----|-------------------------------------------------------------------|-------------------------|--------------------------------|
| 16  | I $\kappa$ B $\alpha$ $\rightarrow$ I $\kappa$ B $\alpha$ -P (S1) | $\ln(2)/(60 \cdot 14)$  | [I $\kappa$ B $\alpha$ ]=647nM |

which describes the phosphorylation of I $\kappa$ B $\alpha$  by I $\kappa$ B $\alpha$  kinase. Phosphorylated I $\kappa$ B $\alpha$  (I $\kappa$ B $\alpha$ -P) is generated with a half-life of 14min serving as a substrate of the SCF $^{\beta-TrCP}$  ligase (Cul1 • Fb1).

To simulate the conditions and perturbations listed in Table T14 we used the protocols defined in Table T16. Inhibition of Nedd8 conjugation as well as Cand1 $^{-/-}$ , Cand2 $^{-/-}$  double knockout were simulated by setting the neddylation rate constant and the total Cand1 concentration to zero, respectively. To simulate Cul1 overexpression we computed a scale factor assuming that Cul1 competes with other cullins for access to Rbx1. Similarly, to simulate  $\beta$ -TrCP overexpression we computed a scale factor assuming that  $\beta$ -TrCP competes with auxiliary SRs for access to Skp1. In the case of Cul1 overexpression we also had to recompute the scale factors that account for sequestration of DCN1, CSN and Cand1 by other cullins. In both cases the overexpression factors ( $f_{Cul1}$  and  $f_{\beta-TrCP}$ ) account for both endogenous and exogenous proteins.

Table T16

| perturbation             | protocol                                                                                                                                                                                                                                                                                                                                                                         | remark                                          |
|--------------------------|----------------------------------------------------------------------------------------------------------------------------------------------------------------------------------------------------------------------------------------------------------------------------------------------------------------------------------------------------------------------------------|-------------------------------------------------|
| WT + MLN4924             | set $k_{nedd} = 0$ at $t = 0$                                                                                                                                                                                                                                                                                                                                                    | Inhibition of Nedd8 conjugation                 |
| DKO                      | set $[Cand1] = 0$ at $t = 0$                                                                                                                                                                                                                                                                                                                                                     | Cand1 $^{-/-}$ , Cand2 $^{-/-}$ double knockout |
| WT / DKO + Cul1          | set $[Cul1]_{OE} = f_{OE,Cul1} \cdot [Cul1]_{WT}^{(a)}$ with<br>$f_{OE,Cul1}^{(b)} = \frac{f_{Cul1}[Rbx1]}{[Rbx1] + (f_{Cul1} - 1)[Cul1]_{WT}}$ and recompute scale factors in Eqs. (S2) – (S4)<br>$f_{DCN1,OE}^{(c)} = \frac{[Cul1]_{OE}}{[Cul1]_{OE} + [Rbx1] - [Cul1]_{WT} + [Cul5]}$ $f_{cand1,OE}^{(d)} = \min\left(1, f_{cand1,WT} \frac{f_{DCN1,OE}}{f_{DCN1,WT}}\right)$ | Cul1 overexpression in WT or DKO                |
| WT / DKO + $\beta$ -TrCP | set $[Fb1]_{OE} = f_{OE,\beta-TrCP} \cdot [Fb1]_{WT}^{(e)}$ with<br>$f_{OE,\beta-TrCP}^{(f)} = \frac{f_{\beta-TrCP}[FbT]_{WT}}{[FbT]_{WT} + (f_{\beta-TrCP} - 1)[Fb1]_{WT}}$ set $[FbT]_{OE} = [FbT]_{WT} - [Fb1]_{OE}$                                                                                                                                                          | $\beta$ -TrCP overexpression in WT or DKO       |

(a)  $[Cul1]_{WT} = 522nM$ , (b)  $f_{Cul1} = 6.6$  in WT and  $f_{Cul1} = 5$  in DKO, (c)  $f_{CSN,OE} = f_{DCN1,OE}$ , (d) not applicable in DKO, (e)  $[Fb1]_{WT} = 64nM$ , (f)  $f_{\beta-TrCP} = 5.5$  in WT and  $f_{\beta-TrCP} = 8$  in DKO,  $[FbT]_{WT} = 2107nM$

### Computation of the cycle time

To compute the cycle time for the cyclic reaction chain depicted in Fig. 7 we assigned to each reversible reaction an effective forward rate constant using the concept of net rate constants [Cleland, 1975]. The latter are denoted by  $k_1, \dots, k_6$  in Fig. S5D (highlighted in red color). For irreversible reactions such as neddylation ( $k_{10}$ ) and deneddylation ( $k_{12}$ ) the net rate constant is identical with the rate constant. Then the net rate constant  $k_6$  is given by

$$k_6 = k_{on,11}[CSN] \frac{k_{12}}{k_{12} + k_{off,11}} \quad (S15)$$

where  $[CSN] = 82nM$  denotes the concentration of free (unbound) CSN under steady state conditions (with  $[S1]=0$ ). The other 5 net rate constants are defined recursively as

$$k_5 = k_{off,6} \frac{k_{10}}{k_{10} + k_{on,6}[Cand1]} \quad (S16)$$

$$k_4 = k_{on,2}([Fb1] + [Fb2] + [Fb2 \cdot S2]) \frac{k_5}{k_5 + k_{off,2}} \quad (S17)$$

$$k_3 = k_{on,9}[DCN1] \frac{k_4}{k_4 + k_{off,9}} \quad (S18)$$

$$k_2 = k_{off,2} \frac{k_3}{k_3 + k_{on,2}[Fb1]} \quad (S19)$$

$$k_1 = k_{on,4}[Cand1] \frac{k_2}{k_2 + k_{off,4}}. \quad (S20)$$

The concentrations for Cand1, Fb1 ( $\beta$ -TrCP), Fb2 (auxiliary SR), Fb2•S2 and DCN1 are steady state concentrations that were obtained by integrating the model equations using the parameter set for WT cells (Tables T2-T13, T15) without substrate for Fb1. Note that in Eq. (S14) the factor in front of the fraction represents the effective “on rate” for binding of any free Skp1•F-box protein to Cul1•Cand1•DCN1 while in Eq. (S16) we used the on rate for binding of a particular F-box protein (Fb1) to bind to Cul1•Cand1. Combining the expressions in Eq. (S15) – (S20) yields the cycle time

$$t_{cycle} = \frac{1}{k_1} + \frac{1}{k_2} + \frac{1}{k_3} + \frac{1}{k_4} + \frac{1}{k_5} + \frac{1}{k_6} + \frac{1}{k_{10}} + \frac{1}{k_{12}}. \quad (S21)$$
